# Supplementary material for: High-Phosphate-Stimulated Macrophage-Derived Exosomes Promote Vascular Calcification via let-7b-5p/TGFBR1 Axis in Chronic Kidney Disease
Source: MDPI journal article supplement (doi:10.3390/cells12010161), 2022-12-30
Supplement: s1 [file s1]

Figure S1

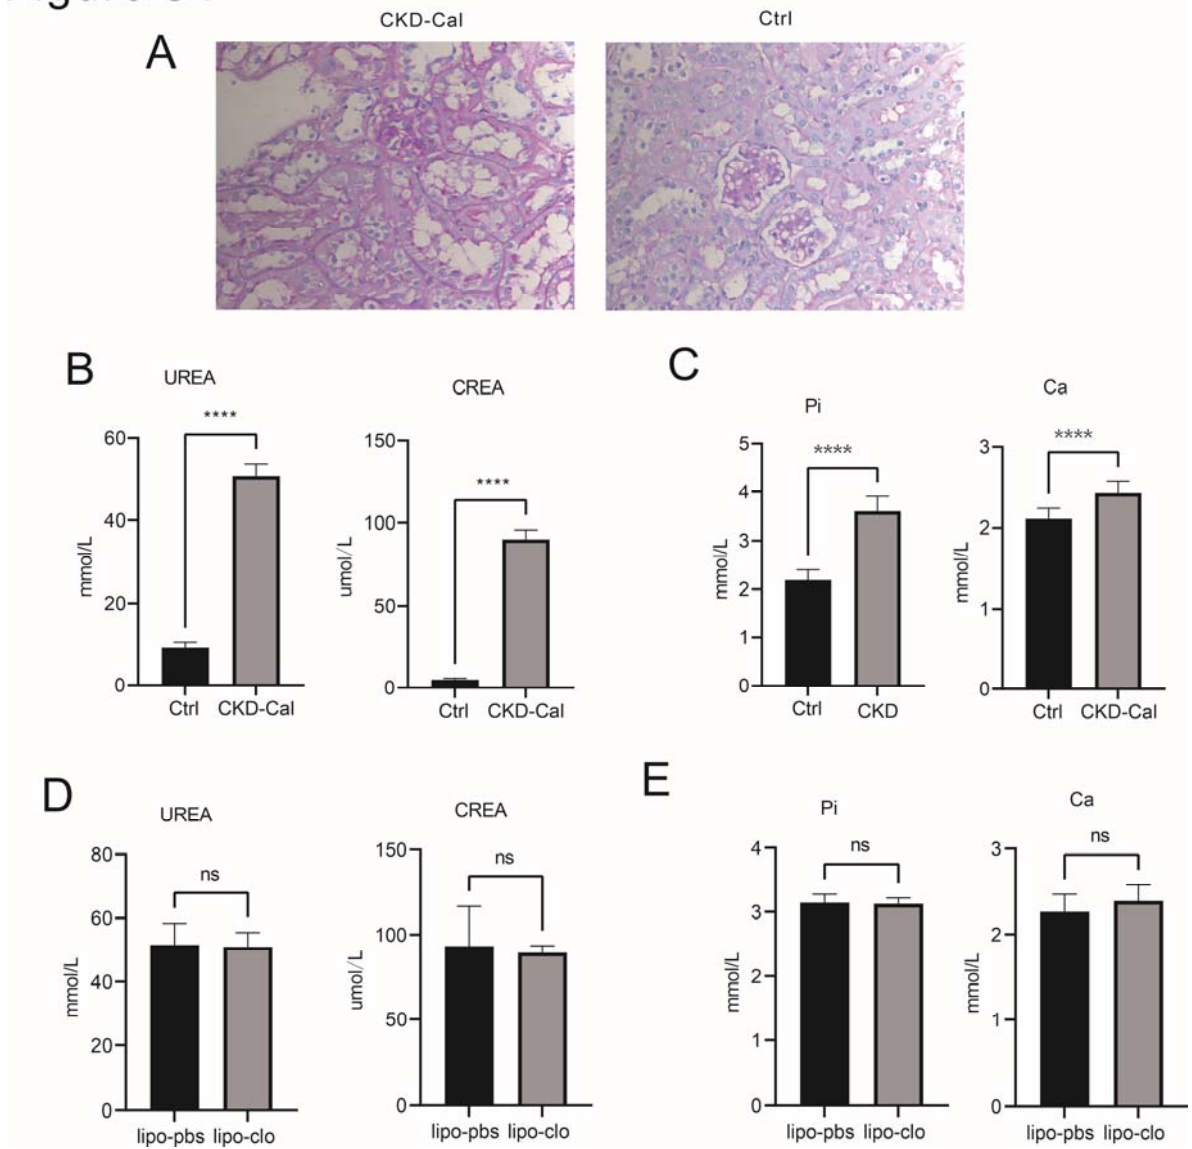

**Figure S1.** Characteristic of CKD mice model: (A) representative images of PAS staining of kidney tissue in CKD (left) and control (right) mice; (B) blood creatine (right) and urea nitrogen (left) levels in CKD and control mice (unpaired *t*-test, *n* = 20); (C) blood calcium (right) and phosphate (left) levels in CKD and control mice (unpaired *t*-test, *n* = 20); (D) blood creatine (right) and urea nitrogen (left) levels in CKD mice treated with lipo-clo or lipo-PBS (unpaired *t*-test, *n* = 5); (E) blood calcium (right) and phosphate (left) levels in CKD treated with lipo-clo or lipo-PBS (unpaired *t*-test, *n* = 5); scale bar, 40  $\mu$ M; \*\*\*\* *p* < 0.0001, n.s. not significant.

Figure S2

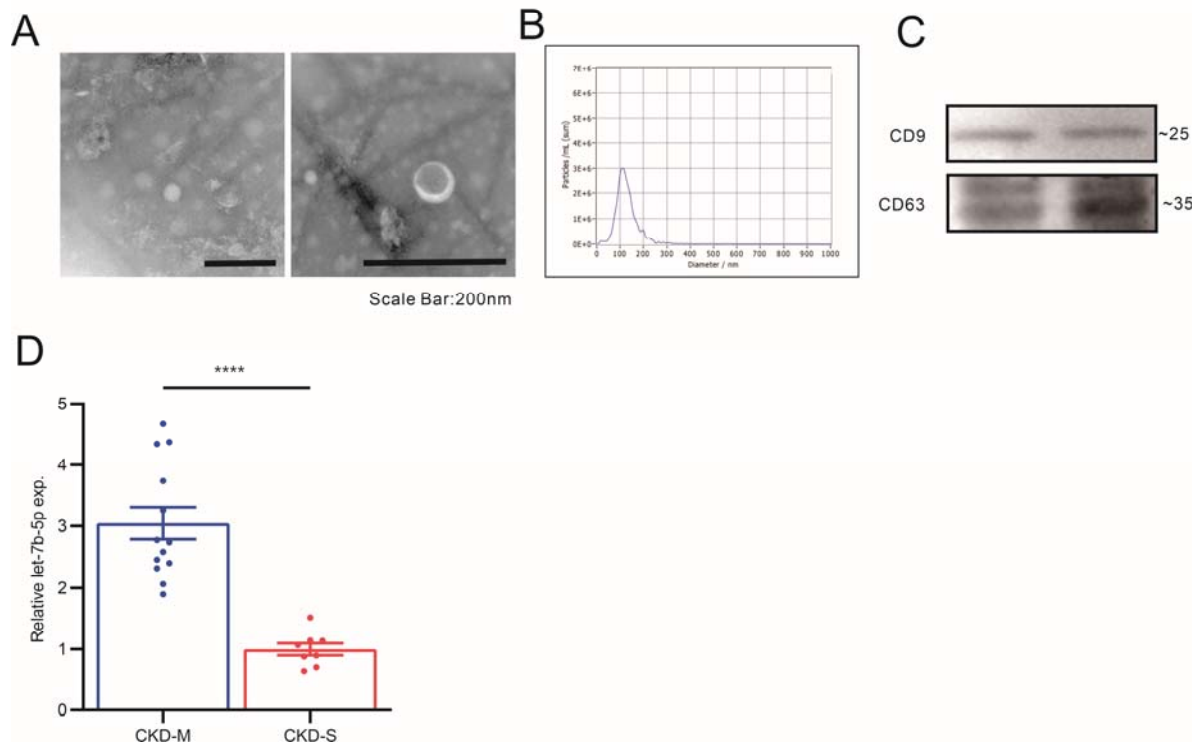

**Figure S2.** Validation of exosomes. A. Cup-shaped morphology of purified Mexo (arrowheads) assessed by TEM. B. The particle size and particle concentration of Mexos were analyzed by nano-particle tracking analysis (NTA). C. Representative images of western blotting showing the exosomal protein markers. D. qRT-PCR results showing let-7b-5p expression levels in arteries of CKD patients (unpaired t-test,  $n > 3$ ). \*\*\*\*  $p < 0.0001$ , n.s. not significant.

Figure S3

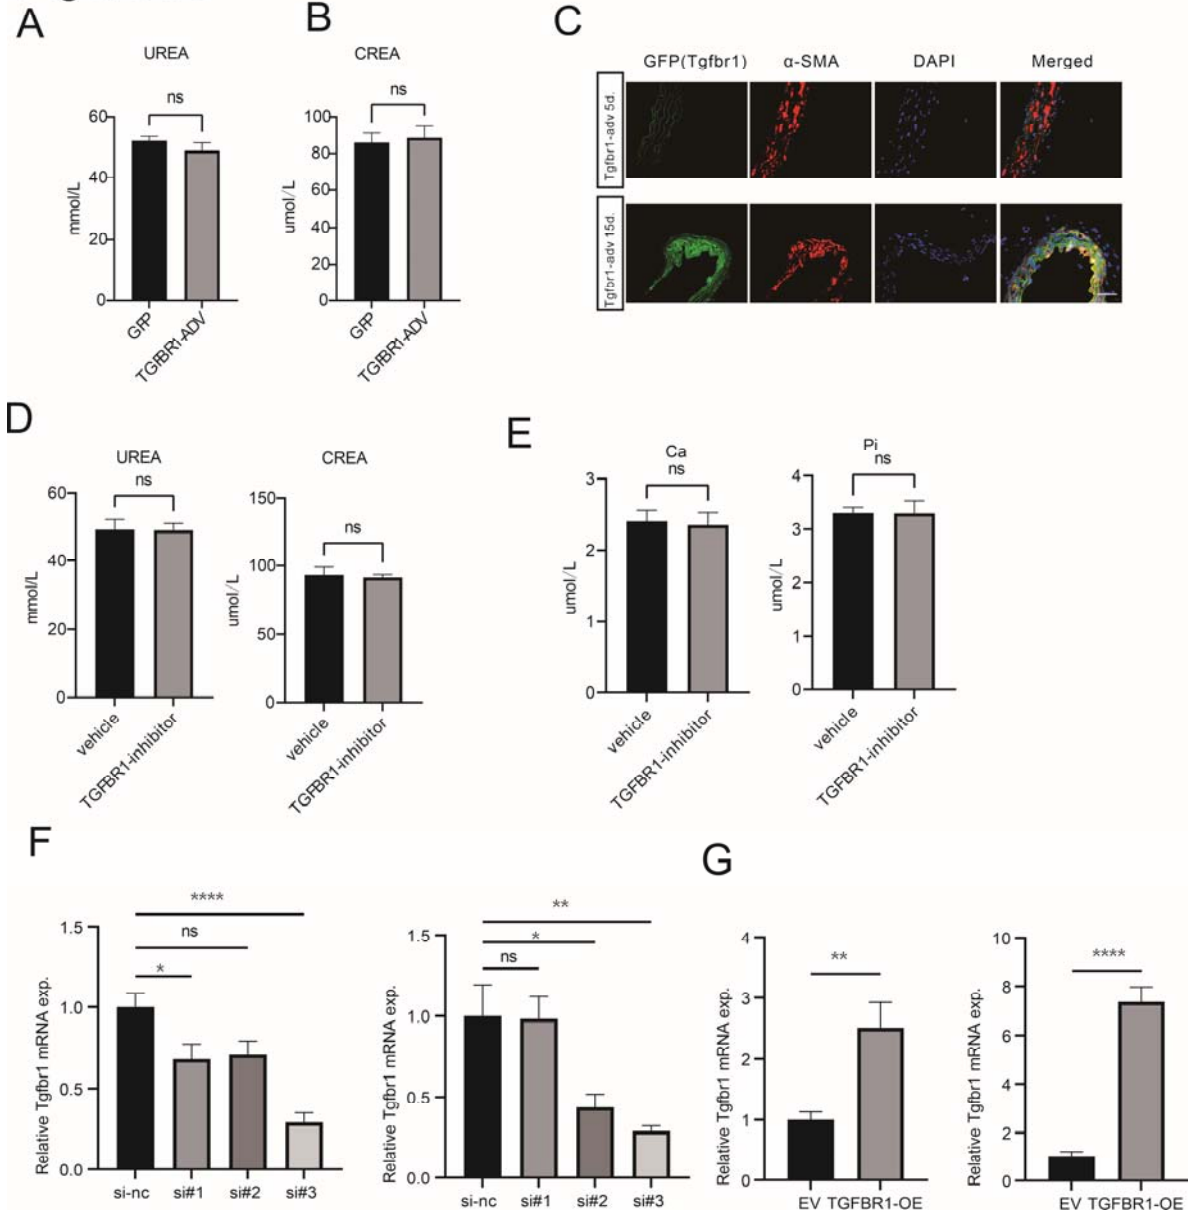

**Figure S3.** Characteristic of CKD mice with TGFBR1 overexpression or inhibition: blood urea nitrogen (A) and creatine (B) levels in CKD mice treated with Tgfr1-adv or GFP-adv (unpaired *t*-test, *n* = 5); representative fluorescence microscopy (C) images of aortas from mice injected with Tgfr1-adv for 5 days or 15 days (*n* = 5); (D) blood urea nitrogen (left) and creatine (right) levels in CKD mice treated with Tgfr1-inhibitor or vehicle (unpaired *t*-test, *n* = 5); (E) blood calcium (right) and phosphate (left) levels in CKD mice treated with Tgfr1-inhibitor or vehicle (unpaired *t*-test, *n* = 5); (F) MOVAS (left) or HASMC (right) cells were transfected with TGFBR1 siRNAs, RNA was extracted after 72 h of culture, and TGFBR1 mRNA levels were detected with qRT-PCR; (G) MOVAS (left) or HASMC (right) cells were transfected with TGFBR1 overexpression plasmids (TGFBR1-OE) or empty vehicle (EV), RNA was extracted after 72 h of culture, and TGFBR1 mRNA levels were detected with qRT-PCR; scale bar, 40 μM. \* *p* < 0.05, \*\* *p* < 0.01, \*\*\*\* *p* < 0.0001, n.s. not significant.
