# Supplementary material for: High-Phosphate-Stimulated Macrophage-Derived Exosomes Promote Vascular Calcification via let-7b-5p/TGFBR1 Axis in Chronic Kidney Disease
Source: MDPI journal article supplement (doi:10.3390/cells12010161), 2022-12-30
Supplement: s1 [file s1]

**Table S1.** Baseline Characteristics of the Patients.

|                                          | Mildly calcified    | Moderately calcified | Severely calcified  | P       |
|------------------------------------------|---------------------|----------------------|---------------------|---------|
| N(Male)                                  | 9(5)                | 8(5)                 | 4(2)                | n.s.    |
| Age (years)                              | 46.9 (4)            | 59.3 (3.3)           | 63.3 (4.4)          | <0.0001 |
| Smoking, ever                            | 5 (55.6%)           | 4 (50%)              | 2 (50%)             | n.s.    |
| Diabetes, n (%)                          | 2(22.2%)            | 3(37.5%)             | 1(25%)              | 0.0284  |
| Hypertension, n (%)                      | 7 (77.8%)           | 5 (62.5%)            | 4 (100%)            | <0.0001 |
| Systolic pressure (mmHg)                 | 142.9 (5.6)         | 139.1 (3.5)          | 140.8 (18.7)        | n.s.    |
| Diastolic pressure (mmHg)                | 90.1 (4.5)          | 80.1(3.7)            | 84.5 (7.7)          | 0.0022  |
| <b>Laboratory findings</b>               |                     |                      |                     |         |
| Platelet (10 <sup>9</sup> /L)            | 201.7(20.5)         | 218.3 (23.4)         | 187.5 (37.3)        | n.s.    |
| Blood urea nitrogen (mmol/L)             | 25.3 (5.6)          | 19.9 (3.4)           | 22.7 (3.2)          | n.s.    |
| Serum creatinine (μmol/L)                | 698.8 (164.7)       | 691 (147.5)          | 633.5 (277.4)       | n.s.    |
| <b>Cholesterol</b>                       |                     |                      |                     |         |
| TC (mmol/L)                              | 4.1 (0.8)           | 3.9 (0.8)            | 4.2 (0.9)           | n.s.    |
| HDL-C (mmol/L)                           | 0.8 (0.1)           | 1.6 (0.3)            | 0.9 (0.1)           | <0.0001 |
| LDL-C (mmol/L)                           | 2.2 (0.3)           | 2.6 (0.6)            | 2.3 (0.4)           | n.s.    |
| Triglycerides (mmol/L)                   | 1.3 (0.2)           | 2 (0.1)              | 1.7 (0.3)           | <0.0001 |
| <b>Mineral Metabolites</b>               |                     |                      |                     |         |
| Calcium (mmol/L)                         | 2.1 (0)             | 2.6 (0.3)            | 2.1 (0.1)           | <0.0001 |
| Adjusted calcium (mmol/L)                | 2.2 (0)             | 2.3 (0.1)            | 2.2 (0)             | 0.0081  |
| Phosphorus (mmol/L)                      | 4.8 (0.3)           | 3.6 (0.5)            | 4.8 (0.3)           | <0.0001 |
| Parathyroid hormone (ng/L)               | 270.3 (69.4)        | 180.1 (64.8)         | 425.1 (276.3)       | 0.0204  |
| FGF-23 (pg/mL)                           | 211.1(133.0-315.6)  | 215.4 (150.8-291.0)  | 232.5 (130.4-299.6) | <0.0001 |
| 1.25(OH) <sub>2</sub> D (pg/mL)          | 26.5 (10.6)         | 24.6 (12.3)          | 25.9 (10.7)         | n.s.    |
| Klotho (pg/mL)                           | 360.0 (275.1-491.6) | 366.1 (257.8-510.9)  | 375.1 (280.7-477.9) | n.s.    |
| <b>Vascular calcification inhibitors</b> |                     |                      |                     |         |
| Albumin (g/dL)                           | 3.5 (0.6)           | 3.5 (0.5)            | 3.6 (0.4)           | n.s.    |
| Osteoprotegerin (pmol/L)                 | 10.6 (5.2)          | 11.0 (4.8)           | 10.2 (5.4)          | n.s.    |
| Fetuin-A (mg/L)                          | 500.6 (166.9)       | 488.6 (150.1)        | 476.6 (156.6)       | n.s.    |
| <b>Duration of Hemodialysis</b>          |                     |                      |                     |         |
| 0 month                                  | 6 (66.7%)           | 5(67.5%)             | 3(75.0%)            | n.s.    |
| 0-6 months                               | 2 (22.2%)           | 2(25.0%)             | 0(0.0%)             | <0.0001 |
| 6 months-1year                           | 1 (11.1%)           | 1(12.5%)             | 1(25.0%)            | 0.0334  |
| <b>CVD</b>                               |                     |                      |                     |         |
| CHD                                      | 3 (33.3%)           | 3 (37.5%)            | 3 (75.0%)           | <0.0001 |
| Stroke                                   | 0 (0%)              | 1 (12.5%)            | 1 (25.0%)           | <0.0001 |
| CHF                                      | 3 (33.3%)           | 2 (25.0%)            | 1 (25.0%)           | 0.3444  |
| CAC score                                | 35.1 (13)           | 272.6 (23.3)         | 780 (91.4)          | <0.0001 |

Abbreviations: TC, total cholesterol; HDL-C, High-density lipoprotein-cholesterol LDL-C, low-density lipoprotein-cholesterol; FGF23, fibroblast growth factor-23; CVD, cardiovascular disease; CHD, coronary heart disease; CHF, congestive heart failure. Note: If normally distributed, values for continuous variables with normal distribution are provided as mean (standard deviation). Otherwise, they are provided as median (interquartile range). Categorical variables are presented as number (percentage). P values for differences across groups were obtained by one-way analysis of variance, Kruskal-Wallis test, or  $\chi^2$  test as appropriate. .
